# Supplementary material for: Rapid Acquisition and Transmission of Drug Resistance Amongst Beijing Lineage Mycobacterium tuberculosis in Vietnam
Source: medRxiv preprint, doi:10.1101/2022.11.03.22281872, version 1 (2022-11-05)
Supplement: Figure S1 [file 281872_file04.docx]

**Figure S1. Distribution of TBM across the phylogeny of N=2,542 Mtb isolates from HCMC, Vietnam.**
